# Supplementary material for: How culture affects validity: understanding Japanese residents’ sense-making of evaluating clinical teachers
Source: HighWire-hosted journal article supplement (doi:10.1136/bmjopen-2020-047602), 2021-08-01
Supplement: bmjopen-2020-047602supp004_data_supplement.pdf [file bmjopen-2020-047602supp004_data_supplement.pdf]

## Appendix 2. Interview guideline

## I. Introductory conversation

1. The respondents are thanked for participating in this study.
2. The purpose of this study is stated.
3. Informed consent is obtained from the participants.
4. Permission to record on audiotape is obtained from the participants.

## II. Remember when you fill in this form

1. Tell me your process of filling the form in detail.
2. Do you remember specific situations or general impressions?
3. Is your criterion different in each item? If yes, how different is it?
4. Which things influence you when you fill out such a rating scale?
5. How do the factors influence you to assign rates to your clinical teachers?
6. To what degree are you influenced by these factors when filling a form?
7. Which situation do you remember in filling in a form?
8. How do you decide the rating from 1 to 5?
9. This form is anonymous. If it is not anonymous, would you change your rating behavior?
10. Is there anything else that influenced your rating behavior?  
Is yes, what is that? And how?

## III. Conclusion

Would you like to say anything else about this topic?
